# Supplementary material
Source: Springer Nature journal article supplement (https://www.springermedizin.de/resource/supplementary/12936_2012_2586_MOESM1_ESM.pdf/9543330)

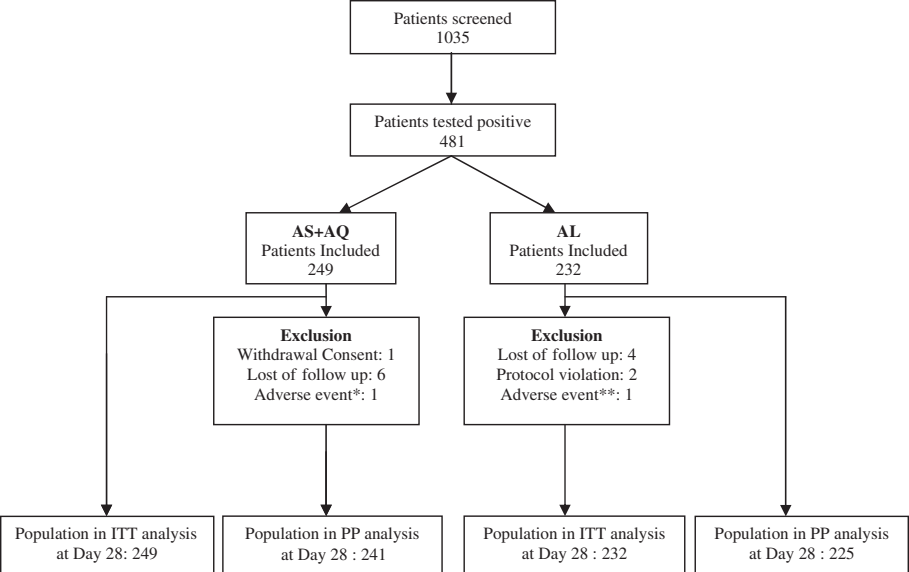

\*ASAT level higher than 3 times the normal for AS+AQ

\*\*Severe anemia for AL

Supplement: MOESM1 [file 9543330]
